# Supplementary material for: Synthesis of all-inorganic CsPb2Br5 perovskite and determination of its luminescence mechanism
Source: Royal Society of Chemistry journal article supplement (doi:10.1039/c7ra10693a), 2017-01-01
Supplement: c7ra10693a2.pdf [file c7ra10693a2.pdf]

## Supporting Information

### **Synthesis of All-Inorganic CsPb<sub>2</sub>Br<sub>5</sub> Perovskite and Determination of Its Luminescence Mechanism**

Jing Li,<sup>a</sup> Huijie Zhang,<sup>a</sup> Song Wang,<sup>b</sup> Debing Long,<sup>a</sup> Mingkai Li,<sup>a</sup> Yizhong Guo,<sup>a</sup> Zhicheng Zhong,<sup>b</sup> Kaifeng Wu,<sup>c</sup> Duofa Wang,<sup>\*,a</sup> and Tianjin Zhang<sup>\*,a</sup>

a Hubei Collaborative Innovation Center for Advanced Organic Chemical Materials, Key Laboratory of Green Preparation and Application for Materials, Ministry of Education, Hubei Provincial Key Laboratory of Polymers, Department of Materials Science and Engineering, Hubei University, Wuhan 430062, People's Republic of China

b Hubei Key Laboratory of Low Dimensional Optoelectronic Materials and Devices, Hubei University of Arts and Science, Xiangyang, Hubei 441053, China

c Dalian Institute of Chemical Physics, Chinese Academy of Sciences, 457 Zhongshan Road, Dalian 116023, China

\*E-mail: duofawang@hotmail.com, zhangtj@hubu.edu.cn

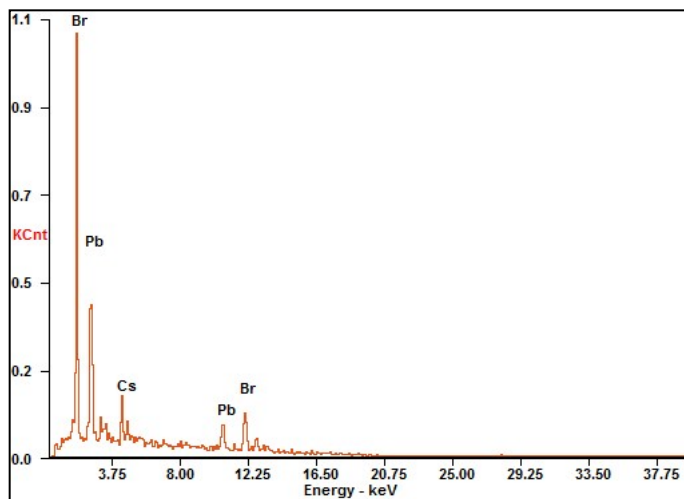

| <i>Element</i> | <i>Wt%</i> | <i>At%</i> |
|----------------|------------|------------|
| <i>BrL</i>     | 45.15      | 65.40      |
| <i>PbM</i>     | 42.16      | 23.55      |
| <i>CsL</i>     | 12.69      | 11.05      |

**Figure S1.** Energy dispersive X-spectroscopy of CsPb<sub>2</sub>Br<sub>5</sub>. The ratio of each element is listed in the table.

**Table S1.** Total energy of unit cell for each reactant and the resultant chemical equation:

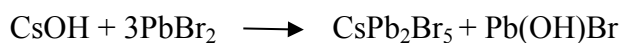

The total energy of each materials is calculated based on the optimized structure using DFT. The change of the total energy is obtained by the difference between the products and the reactants.

|                   | <b>CsOH</b>     | <b>PbBr<sub>2</sub></b> | <b>CsPb<sub>2</sub>Br<sub>5</sub></b> | <b>Pb(OH)Br</b> |
|-------------------|-----------------|-------------------------|---------------------------------------|-----------------|
| Total energy (Et) | -386.66121413Ry | -1032.20505769Ry        | -2505.07266819Ry                      | -978.53862569Ry |

$$\Delta E_t = E_{t_{\text{CsPb}_2\text{Br}_5}} + E_{t_{\text{Pb(OH)Br}}} - E_{t_{\text{CsOH}}} - 3E_{t_{\text{PbBr}_2}} = -0.33507975\text{Ry} \approx -4.559 \text{ eV}$$

**Movie S1. Movie S1.mp4**
